# Supplementary material for: Development of massive multilevel molecular dynamics simulation program, platypus (PLATform for dYnamic protein unified simulation), for the elucidation of protein functions
Source: PubMed Central journal article supplement (PMC4825406; doi:10.1002/jcc.24318), 2016-03-04
Supplement: JCC-37-1125-s001.pdf [file JCC-37-1125-s001.pdf]

## **Supplementary Materials**

Development of massive multi-level molecular dynamics simulation program,

Platypus (PLATform for dYnamic Protein Unified Simulation),

for the elucidation of protein functions

Yu Takano,\* Kazuto Nakata, Yasushige Yonezawa, and Haruki Nakamura

Table S1. Speedups and parallelization ratios for the computation of eigenvalue problems by LAPACK (dsyevd).

| Number of CPUs | Number of threads | Number of cores | Elapsed time [sec] | Speedup <sup>a</sup> | Serial fraction [%] <sup>b</sup> | Parallelization ratio [%] <sup>c</sup> |
|----------------|-------------------|-----------------|--------------------|----------------------|----------------------------------|----------------------------------------|
| 1              | 1                 | 1               | 12.448             | 1.000                | —                                | —                                      |
| 1              | 8                 | 8               | 4.175              | 2.981                | 25.047                           | 75.953                                 |

<sup>a</sup> Speedup was evaluated by using eq. 3. Here, the elapsed time measured with a single core processor was used as  $T_1$ .

<sup>b</sup> Serial fraction was evaluated by using eq. 5.

<sup>c</sup> Parallelization ratio was evaluated by using eq. 4. Here, the elapsed time measured with a single core processor was used as  $T_1$ .

Table S2. Speedups and parallelization ratios for energy calculations of DIMER at the HF/cc-pVDZ level of theory.

| Number of CPUs | Number of threads | Number of cores | Elapsed time[sec] |                        | Speedup <sup>a</sup> |                        | Serial fraction[%] <sup>b</sup> |                        | Parallelization ratio[%] <sup>c</sup> |                        |
|----------------|-------------------|-----------------|-------------------|------------------------|----------------------|------------------------|---------------------------------|------------------------|---------------------------------------|------------------------|
|                |                   |                 | Total             | Fock matrix generation | Total                | Fock matrix generation | Total                           | Fock matrix generation | Total                                 | Fock matrix generation |
| 1              | 1                 | 1               | 19295.980         | 18261.522              | 1.000                | 1.000                  | —                               | —                      | —                                     | —                      |
| 1              | 8                 | 8               | 2420.357          | 2283.530               | 7.972                | 7.997                  | 0.0495                          | 0.0053                 | 99.9505                               | 99.9947                |
| 2              | 8                 | 16              | 1217.018          | 1142.758               | 15.855               | 15.980                 | 0.0609                          | 0.0083                 | 99.9391                               | 99.9917                |
| 4              | 8                 | 32              | 615.492           | 572.010                | 31.351               | 31.925                 | 0.0668                          | 0.0076                 | 99.9332                               | 99.9924                |
| 8              | 8                 | 64              | 316.704           | 285.195                | 60.927               | 64.032                 | 0.0800                          | -0.0008                | 99.9200                               | 100.0008               |
| 16             | 8                 | 128             | 167.661           | 144.157                | 115.089              | 126.678                | 0.0883                          | 0.0082                 | 99.9117                               | 99.9918                |
| 32             | 8                 | 256             | 90.798            | 73.735                 | 212.517              | 247.663                | 0.0802                          | 0.0132                 | 99.9198                               | 99.9868                |
| 64             | 8                 | 512             | 53.444            | 37.804                 | 361.053              | 483.052                | 0.0818                          | 0.0117                 | 99.9182                               | 99.9883                |
| 128            | 8                 | 1024            | 33.719            | 19.239                 | 572.265              | 949.170                | 0.0772                          | 0.0077                 | 99.9228                               | 99.9923                |
| 256            | 8                 | 2048            | 23.971            | 10.297                 | 804.971              | 1773.527               | 0.0754                          | 0.0076                 | 99.9246                               | 99.9924                |
| 512            | 8                 | 4096            | 19.893            | 5.836                  | 969.964              | 3129.348               | 0.0787                          | 0.0075                 | 99.9213                               | 99.9925                |
| 1024           | 8                 | 8192            | 19.538            | 4.063                  | 987.629              | 4495.108               | 0.0891                          | 0.0100                 | 99.9109                               | 99.9900                |
| 2048           | 8                 | 16384           | 16.314            | 2.922                  | 1182.783             | 6249.603               | 0.0784                          | 0.0099                 | 99.9216                               | 99.9901                |

<sup>a</sup> Speedup was evaluated by using eq. 3. Here, the elapsed time measured with a single core processor was used as  $T_1$ .

<sup>b</sup> Serial fraction was evaluated by using eq. 5.

<sup>c</sup> Parallelization ratio was evaluated by using eq. 4. Here, the elapsed time measured with a single core processor was used as  $T_1$ .

Table S3. Comparison of speedups and parallelization ratios for energy calculations of DIMER between 64 (64 CPUs x 1 thread) and 512 (64 CPUs x 8 threads) core processors at the HF/cc-pVDZ level of theory.

| Number of CPUs | Number of threads | Number of cores | Elapsed time[sec] |                        | Speedup <sup>a,b</sup> |                        | Serial fraction[%] <sup>a,c</sup> |                        | Parallelization ratio[%] <sup>a,d</sup> |                        |
|----------------|-------------------|-----------------|-------------------|------------------------|------------------------|------------------------|-----------------------------------|------------------------|-----------------------------------------|------------------------|
|                |                   |                 | Total             | Fock matrix generation | Total                  | Fock matrix generation | Total                             | Fock matrix generation | Total                                   | Fock matrix generation |
| 64             | 1                 | 64              | 373.727           | 300.942                | 1.000                  | 1.000                  | —                                 | —                      | —                                       | —                      |
| 64             | 8                 | 512             | 53.444            | 37.804                 | 6.993                  | 7.960                  | 0.0328                            | 0.0011                 | 99.9672                                 | 99.9989                |

<sup>a</sup> Speedup, serial fraction, and parallelization ratio were evaluated on the basis of the elapsed time measured with 64 core processors.

<sup>b</sup> Speedup was evaluated by using eq. 3. Here, the elapsed time measured with 64 core processors was used as  $T_1$ .

<sup>c</sup> Serial fraction was evaluated by using eq. 5.

<sup>d</sup> Parallelization ratio was evaluated by using eq. 4. Here, the elapsed time measured with 64 core processors was used as  $T_1$ .

Table S4. Speedups and parallelization ratios for energy calculations of DIMER at the B3LYP/cc-pVDZ level of theory.

| Number of CPUs | Number of threads | Number of cores | Elapsed time[sec] |                        | Speedup <sup>a</sup> |                        | Serial fraction[%] <sup>b</sup> |                        | Parallelization ratio[%] <sup>c</sup> |                        |
|----------------|-------------------|-----------------|-------------------|------------------------|----------------------|------------------------|---------------------------------|------------------------|---------------------------------------|------------------------|
|                |                   |                 | Total             | Fock matrix generation | Total                | Fock matrix generation | Total                           | Fock matrix generation | Total                                 | Fock matrix generation |
| 1              | 1                 | 1               | 11657.211         | 10618.977              | 1.000                | 1.000                  | —                               | —                      | —                                     | —                      |
| 1              | 8                 | 8               | 1470.312          | 1335.344               | 7.928                | 7.952                  | 0.1290                          | 0.0858                 | 99.8710                               | 99.9142                |
| 2              | 8                 | 16              | 740.755           | 667.288                | 15.737               | 15.914                 | 0.1114                          | 0.0362                 | 99.8886                               | 99.9638                |
| 4              | 8                 | 32              | 377.119           | 334.818                | 30.911               | 31.716                 | 0.1136                          | 0.0289                 | 99.8864                               | 99.9711                |
| 8              | 8                 | 64              | 194.683           | 166.871                | 59.878               | 63.636                 | 0.1093                          | 0.0091                 | 99.8907                               | 99.9909                |
| 16             | 8                 | 128             | 105.012           | 84.276                 | 111.009              | 126.002                | 0.1205                          | 0.0125                 | 99.8795                               | 99.9875                |
| 32             | 8                 | 256             | 59.014            | 43.065                 | 197.532              | 246.582                | 0.1161                          | 0.0150                 | 99.8839                               | 99.9850                |
| 64             | 8                 | 512             | 36.094            | 22.083                 | 322.972              | 480.860                | 0.1145                          | 0.0127                 | 99.8855                               | 99.9873                |
| 128            | 8                 | 1024            | 24.425            | 11.271                 | 477.267              | 942.127                | 0.1120                          | 0.0085                 | 99.8880                               | 99.9915                |
| 256            | 8                 | 2048            | 21.548            | 6.400                  | 540.980              | 1659.103               | 0.1361                          | 0.0115                 | 99.8639                               | 99.9885                |
| 512            | 8                 | 4096            | 16.207            | 3.532                  | 719.258              | 3006.898               | 0.1146                          | 0.0088                 | 99.8854                               | 99.9912                |
| 1024           | 8                 | 8192            | 15.062            | 2.312                  | 773.948              | 4592.288               | 0.1170                          | 0.0096                 | 99.8830                               | 99.9904                |
| 2048           | 8                 | 16384           | 13.841            | 1.798                  | 842.204              | 5905.298               | 0.1126                          | 0.0108                 | 99.8874                               | 99.9892                |

<sup>a</sup> Speedup was evaluated by using eq. 3. Here, the elapsed time measured with a single core processor was used as  $T_1$ .

<sup>b</sup> Serial fraction was evaluated by using eq. 5.

<sup>c</sup> Parallelization ratio was evaluated by using eq. 4. Here, the elapsed time measured with a single core processor was used as  $T_1$ .

Table S5. Comparison of speedups and parallelization ratios for energy calculations of DIMER between 64 (64 CPUs x 1 thread) and 512 (64 CPUs x 8 threads) core processors at the B3LYP/cc-pVDZ level of theory.

| Number of CPUs | Number of threads | Number of cores | Elapsed time[sec] |                        | Speedup <sup>a,b</sup> |                        | Serial fraction[%] <sup>a,c</sup> |                        | Parallelization ratio[%] <sup>a,d</sup> |                        |
|----------------|-------------------|-----------------|-------------------|------------------------|------------------------|------------------------|-----------------------------------|------------------------|-----------------------------------------|------------------------|
|                |                   |                 | Total             | Fock matrix generation | Total                  | Fock matrix generation | Total                             | Fock matrix generation | Total                                   | Fock matrix generation |
| 64             | 1                 | 64              | 247.253           | 176.085                | 1.000                  | 1.000                  | —                                 | —                      | —                                       | —                      |
| 64             | 8                 | 512             | 36.094            | 22.083                 | 6.850                  | 7.974                  | 0.0384                            | 0.0007                 | 99.9616                                 | 99.9993                |

<sup>a</sup> Speedup, serial fraction, and parallelization ratio were evaluated on the basis of the elapsed time measured with 64 core processors.

<sup>b</sup> Speedup was evaluated by using eq. 3. Here, the elapsed time measured with 64 core processors was used as  $T_1$ .

<sup>c</sup> Serial fraction was evaluated by using eq. 5.

<sup>d</sup> Parallelization ratio was evaluated by using eq. 4. Here, the elapsed time measured with 64 core processors was used as  $T_1$ .

Table S6. Speedups and parallelization ratios for energy calculations of DIMER at the CASCI(16,16)/6-31G\*\* level of theory.

| Number of CPUs | Number of threads | Number of cores | Elapsed time[sec] |                         |                        |                    | Speedup <sup>a,b</sup> |                         |                        |                    |
|----------------|-------------------|-----------------|-------------------|-------------------------|------------------------|--------------------|------------------------|-------------------------|------------------------|--------------------|
|                |                   |                 | Total             | Integral transformation | Fock matrix generation | Eigenvalue problem | Total                  | Integral transformation | Fock matrix generation | Eigenvalue problem |
| 256            | 8                 | 2048            | 691.328           | 308.495                 | 5.516                  | 289.848            | 1.000                  | 1.000                   | 1.000                  | 1.000              |
| 512            | 8                 | 4096            | 529.307           | 145.659                 | 3.081                  | 171.417            | 1.306                  | 2.118                   | 1.790                  | 1.691              |
| 1024           | 8                 | 8192            | 466.399           | 105.787                 | 2.033                  | 142.372            | 1.482                  | 2.916                   | 2.713                  | 2.036              |

| Serial fraction[%] <sup>a,c</sup> |                         |                        |                    | Parallelization ratio[%] <sup>a</sup> |                         |                        |                    |
|-----------------------------------|-------------------------|------------------------|--------------------|---------------------------------------|-------------------------|------------------------|--------------------|
| Total                             | Integral transformation | Fock matrix generation | Eigenvalue problem | Total                                 | Integral transformation | Fock matrix generation | Eigenvalue problem |
| —                                 | —                       | —                      | —                  | —                                     | —                       | —                      | —                  |
| 0.0553                            | -0.0026                 | 0.0065                 | 0.0109             | 99.9447                               | 100.0026                | 99.9935                | 99.9891            |
| 0.0637                            | 0.0069                  | 0.0092                 | 0.0231             | 99.9363                               | 99.9931                 | 99.9908                | 99.9769            |

<sup>a</sup> Speedup, serial fraction, and parallelization ratio were evaluated on the basis of the elapsed time measured with 2048 core processors.

<sup>b</sup> Speedup was evaluated by using eq. 3. Here, the elapsed time measured with 2048 core processors was used as  $T_1$ .

<sup>c</sup> Serial fraction was evaluated by using eq. 5.

<sup>d</sup> Parallelization ratio was evaluated by using eq. 4. Here, the elapsed time measured with 2048 core processors was used as  $T_1$ .

Table S7. Speedups and parallelization ratios for force calculations of DIMER at the HF/cc-pVDZ level of theory.

| Number of CPUs | Number of threads | Number of cores | Elapsed time[sec] |                     |                     | Speedup <sup>a</sup> |                     |                     | Serial fraction[%] <sup>b</sup> |                     |                     | Parallelization ratio[%] <sup>c</sup> |                     |                     |
|----------------|-------------------|-----------------|-------------------|---------------------|---------------------|----------------------|---------------------|---------------------|---------------------------------|---------------------|---------------------|---------------------------------------|---------------------|---------------------|
|                |                   |                 | Total             | 1-electron integral | 2-electron integral | Total                | 1-electron integral | 2-electron integral | Total                           | 1-electron integral | 2-electron integral | Total                                 | 1-electron integral | 2-electron integral |
| 1              | 1                 | 1               | 55866.363         | 1366.995            | 54498.802           | 1.000                | 1.000               | 1.000               | —                               | —                   | —                   | —                                     | —                   | —                   |
| 1              | 8                 | 8               | 6909.150          | 172.495             | 6735.949            | 8.086                | 7.925               | 8.091               | -0.1517                         | 0.1355              | -0.1602             | 100.1517                              | 99.8645             | 100.1602            |
| 2              | 8                 | 16              | 3467.883          | 86.162              | 3381.134            | 16.110               | 15.865              | 16.118              | -0.0454                         | 0.0565              | -0.0490             | 100.0454                              | 99.9435             | 100.0490            |
| 4              | 8                 | 32              | 1738.001          | 43.394              | 1694.092            | 32.144               | 31.502              | 32.170              | -0.0145                         | 0.0510              | -0.0170             | 100.0145                              | 99.9490             | 100.0170            |
| 8              | 8                 | 64              | 885.490           | 22.065              | 862.910             | 63.091               | 61.954              | 63.157              | 0.0229                          | 0.0524              | 0.0212              | 99.9771                               | 99.9476             | 99.9788             |
| 16             | 8                 | 128             | 449.616           | 11.380              | 437.715             | 124.254              | 120.127             | 124.508             | 0.0237                          | 0.0516              | 0.0221              | 99.9763                               | 99.9484             | 99.9779             |
| 32             | 8                 | 256             | 229.790           | 6.129               | 223.142             | 243.119              | 223.031             | 244.234             | 0.0208                          | 0.0580              | 0.0189              | 99.9792                               | 99.9420             | 99.9811             |
| 64             | 8                 | 512             | 119.173           | 3.489               | 115.157             | 468.782              | 391.846             | 473.255             | 0.0180                          | 0.0600              | 0.0160              | 99.9820                               | 99.9400             | 99.9840             |
| 128            | 8                 | 1024            | 64.038            | 2.153               | 61.368              | 872.400              | 635.000             | 888.071             | 0.0170                          | 0.0599              | 0.0150              | 99.9830                               | 99.9401             | 99.9850             |
| 256            | 8                 | 2048            | 36.330            | 1.953               | 33.425              | 1537.740             | 699.868             | 1630.466            | 0.0162                          | 0.0941              | 0.0125              | 99.9838                               | 99.9059             | 99.9875             |
| 512            | 8                 | 4096            | 22.742            | 1.347               | 20.105              | 2456.563             | 1014.558            | 2710.729            | 0.0163                          | 0.0742              | 0.0125              | 99.9837                               | 99.9258             | 99.9875             |
| 1024           | 8                 | 8192            | 14.401            | 1.132               | 12.236              | 3879.423             | 1207.309            | 4454.078            | 0.0136                          | 0.0706              | 0.0102              | 99.9864                               | 99.9294             | 99.9898             |
| 2048           | 8                 | 16384           | 10.394            | 1.120               | 8.455               | 5375.072             | 1220.981            | 6446.052            | 0.0125                          | 0.0758              | 0.0094              | 99.9875                               | 99.9242             | 99.9906             |
| 4096           | 8                 | 32768           | 8.231             | 0.945               | 5.830               | 6787.285             | 1447.136            | 9347.254            | 0.0117                          | 0.0661              | 0.0076              | 99.9883                               | 99.9339             | 99.9924             |
| 8192           | 8                 | 65536           | 7.459             | 1.086               | 5.235               | 7489.404             | 1258.595            | 10411.361           | 0.0118                          | 0.0779              | 0.0081              | 99.9882                               | 99.9221             | 99.9919             |
| 16384          | 8                 | 131072          | 9.153             | 0.985               | 4.406               | 6103.336             | 1387.374            | 12368.753           | 0.0156                          | 0.0713              | 0.0073              | 99.9844                               | 99.9287             | 99.9927             |

<sup>a</sup> Speedup was evaluated by using eq. 3. Here, the elapsed time measured with a single core processor was used as  $T_1$ .

<sup>b</sup> Serial fraction was evaluated by using eq. 5.

<sup>c</sup> Parallelization ratio was evaluated by using eq. 4. Here, the elapsed time measured with a single core processor was used as  $T_1$ .



Table S8. Comparison of speedup and parallelization ratios for force calculations of DIMER between 64 (64 CPUs x 1 thread) and 512 (64 CPUs x 8 threads) core processors at the HF/cc-pVDZ level of theory.

| Number of CPUs | Number of threads | Number of cores | Elapsed time[sec] |                     |                     | Speedup <sup>a,b</sup> |                     |                     |
|----------------|-------------------|-----------------|-------------------|---------------------|---------------------|------------------------|---------------------|---------------------|
|                |                   |                 | Total             | 1-electron integral | 2-electron integral | Total                  | 1-electron integral | 2-electron integral |
| 64             | 1                 | 64              | 948.643           | 23.281              | 924.846             | 1.000                  | 1.000               | 1.000               |
| 64             | 8                 | 512             | 119.173           | 3.489               | 115.157             | 7.960                  | 6.673               | 8.031               |

| Serial fraction[%] <sup>a,c</sup> |                     |                     | Parallelization ratio[%] <sup>a,d</sup> |                     |                     |
|-----------------------------------|---------------------|---------------------|-----------------------------------------|---------------------|---------------------|
| Total                             | 1-electron integral | 2-electron integral | Total                                   | 1-electron integral | 2-electron integral |
| 0.0011                            | 0.0456              | -0.0009             | 99.9989                                 | 99.9544             | 100.0009            |

<sup>a</sup> Speedup, serial fraction, and parallelization ratio were evaluated on the basis of the elapsed time measured with 64 core processors.

<sup>b</sup> Speedup was evaluated by using eq. 3. Here, the elapsed time measured with 64 core processors was used as  $T_1$ .

<sup>c</sup> Serial fraction was evaluated by using eq. 5.

<sup>d</sup> Parallelization ratio was evaluated by using eq. 4. Here, the elapsed time measured with 64 core processors was used as  $T_1$ .

Table S9. Speedup and parallelization ratios of force calculations of DIMER at the B3LYP/cc-pVDZ level of theory.

| Number of CPUs | Number of threads | Number of cores | Elapsed time[sec] |                     |                     | Speedup <sup>a</sup> |                     |                     | Serial fraction[%] <sup>b</sup> |                     |                     | Parallelization ratio[%] <sup>c</sup> |                     |                     |
|----------------|-------------------|-----------------|-------------------|---------------------|---------------------|----------------------|---------------------|---------------------|---------------------------------|---------------------|---------------------|---------------------------------------|---------------------|---------------------|
|                |                   |                 | Total             | 1-electron integral | 2-electron integral | Total                | 1-electron integral | 2-electron integral | Total                           | 1-electron integral | 2-electron integral | Total                                 | 1-electron integral | 2-electron integral |
| 1              | 1                 | 1               | 57456.397         | 1367.819            | 56087.529           | 1.000                | 1.000               | 1.000               | —                               | —                   | —                   | —                                     | —                   | —                   |
| 1              | 8                 | 8               | 7099.900          | 171.568             | 6927.539            | 8.093                | 7.972               | 8.096               | -0.1634                         | 0.0494              | -0.1699             | 100.1634                              | 99.9506             | 100.1699            |
| 2              | 8                 | 16              | 3726.127          | 86.030              | 3485.639            | 15.420               | 15.899              | 16.091              | 0.2508                          | 0.0422              | -0.0377             | 99.7492                               | 99.9578             | 100.0377            |
| 4              | 8                 | 32              | 1875.301          | 43.286              | 1744.087            | 30.638               | 31.599              | 32.159              | 0.1433                          | 0.0409              | -0.0159             | 99.8567                               | 99.9591             | 100.0159            |
| 8              | 8                 | 64              | 957.335           | 21.943              | 863.837             | 60.017               | 62.336              | 64.928              | 0.1053                          | 0.0424              | -0.0227             | 99.8947                               | 99.9576             | 100.0227            |
| 16             | 8                 | 128             | 484.818           | 11.262              | 441.570             | 118.511              | 121.458             | 127.018             | 0.0630                          | 0.0424              | 0.0061              | 99.9370                               | 99.9576             | 99.9939             |
| 32             | 8                 | 256             | 249.014           | 6.005               | 219.130             | 230.736              | 227.768             | 255.955             | 0.0429                          | 0.0486              | 0.0001              | 99.9571                               | 99.9514             | 99.9999             |
| 64             | 8                 | 512             | 129.212           | 3.847               | 112.522             | 444.666              | 355.597             | 498.457             | 0.0296                          | 0.0861              | 0.0053              | 99.9704                               | 99.9139             | 99.9947             |
| 128            | 8                 | 1024            | 68.926            | 2.409               | 57.419              | 833.594              | 567.851             | 976.816             | 0.0223                          | 0.0785              | 0.0047              | 99.9777                               | 99.9215             | 99.9953             |
| 256            | 8                 | 2048            | 36.738            | 1.352               | 28.602              | 1563.951             | 1011.786            | 1960.982            | 0.0151                          | 0.0500              | 0.0022              | 99.9849                               | 99.9500             | 99.9978             |
| 512            | 8                 | 4096            | 23.546            | 1.096               | 18.859              | 2440.187             | 1247.992            | 2974.001            | 0.0166                          | 0.0557              | 0.0092              | 99.9834                               | 99.9443             | 99.9908             |
| 1024           | 8                 | 8192            | 16.768            | 1.223               | 13.876              | 3426.456             | 1118.870            | 4042.147            | 0.0170                          | 0.0772              | 0.0125              | 99.9830                               | 99.9228             | 99.9875             |
| 2048           | 8                 | 16384           | 13.715            | 1.153               | 10.789              | 4189.263             | 1185.916            | 5198.529            | 0.0178                          | 0.0782              | 0.0131              | 99.9822                               | 99.9218             | 99.9869             |
| 4096           | 8                 | 32768           | 12.394            | 1.132               | 9.348               | 4635.970             | 1208.062            | 5999.909            | 0.0185                          | 0.0797              | 0.0136              | 99.9815                               | 99.9203             | 99.9864             |
| 8192           | 8                 | 65536           | 11.291            | 1.306               | 8.204               | 5088.483             | 1047.126            | 6836.358            | 0.0181                          | 0.0940              | 0.0131              | 99.9819                               | 99.9060             | 99.9869             |
| 16384          | 8                 | 131072          | 9.873             | 0.798               | 7.508               | 5819.641             | 1713.486            | 7470.565            | 0.0164                          | 0.0576              | 0.0126              | 99.9836                               | 99.9424             | 99.9874             |

<sup>a</sup> Speedup was evaluated by using eq. 3. Here, the elapsed time measured with a single core processor was used as  $T_1$ .

<sup>b</sup> Serial fraction was evaluated by using eq. 5.

<sup>c</sup> Parallelization ratio was evaluated by using eq. 4. Here, the elapsed time measured with a single core processor was used as  $T_1$ .

Table S10. Comparison of speedups and parallelization ratios for force calculations of DIMER between 64 (64 CPUs x 1 thread) and 512 (64 CPUs x 8 threads) core processors at the B3LYP/cc-pVDZ level of theory.

| Number of CPUs | Number of threads | Number of cores | Elapsed time[sec] |                     |                     | Speedup <sup>a,b</sup> |                     |                     |
|----------------|-------------------|-----------------|-------------------|---------------------|---------------------|------------------------|---------------------|---------------------|
|                |                   |                 | Total             | 1-electron integral | 2-electron integral | Total                  | 1-electron integral | 2-electron integral |
| 64             | 1                 | 64              | 1020.217          | 23.280              | 900.466             | 1.000                  | 1.000               | 1.000               |
| 64             | 8                 | 512             | 129.212           | 3.847               | 112.522             | 7.896                  | 6.052               | 8.003               |

| Serial fraction[%] <sup>a,c</sup> |                     |                     | Parallelization ratio[%] <sup>a,d</sup> |                     |                     |
|-----------------------------------|---------------------|---------------------|-----------------------------------------|---------------------|---------------------|
| Total                             | 1-electron integral | 2-electron integral | Total                                   | 1-electron integral | 2-electron integral |
| 0.0030                            | 0.0752              | -0.0001             | 99.9970                                 | 99.9248             | 100.0001            |

<sup>a</sup> Speedup, serial fraction, and parallelization ratio were evaluated on the basis of the elapsed time measured with 64 core processors.

<sup>b</sup> Speedup was evaluated by using eq. 3. Here, the elapsed time measured with 64 core processors was used as  $T_1$ .

<sup>c</sup> Serial fraction was evaluated by using eq. 5.

<sup>d</sup> Parallelization ratio was evaluated by using eq. 4. Here, the elapsed time measured with 64 core processors was used as  $T_1$ .
